# Supplementary material for: Real‐Time Multisignal Detection and Identification in Known and Unknown HF Channels: A Deep Learning Method
Source: Hindawi journal article supplement (doi:10.1155/2022/1674702), 2022-01-01
Supplement: f1 [file 1674702.f1.docx]

## Supplementary Materials

Figure S1: The confusion matrixes of MSDIN on the AWGN Dataset at different SNRs.

Figure S2: The confusion matrixes of MSDIN on the Watterson Dataset at different SNRs.

Figure S3: The confusion matrixes of MSDIN on the Rayleigh Dataset at different SNRs.

Figure S4: The confusion matrixes of MSDIN training on the AWGN Dataset and testing on the Watterson Dataset at different SNRs.

Figure S5: The confusion matrixes of MAAN at different SNRs, where the source domain is the AWGN Dataset and target domain is the Watterson Dataset.

Figure S6: The confusion matrixes of MSDIN training on the Watterson Dataset and testing on the AWGN Dataset at different SNRs.

Figure S7: The confusion matrixes of MAAN at different SNRs, where the source domain is the Watterson Dataset and the target domain is the AWGN Dataset.

|  |  |
| --- | --- |
| (a) | (b) |
|  |  |
| (c) | (d) |

Figure S: The confuse matrixes of MSDIN on the AWGN Dataset at different SNR. (a) SNR= 2dB. (b) SNR=-2dB. (c) SNR=-6dB. (d) SNR=-10dB.

|  |  |
| --- | --- |
| (a) | (b) |
|  |  |
| (c) | (d) |

Figure S2: The confuse matrixes of MSDIN on the Watterson Dataset at different SNR. (a) SNR= 2dB. (b) SNR=-2dB. (c) SNR=-6dB. (d) SNR=-10dB.

|  |  |
| --- | --- |
| (a) | (b) |
|  |  |
| (c) | (d) |

Figure S3: The confuse matrixes of MSDIN on the Rayleigh Dataset at different SNR. (a) SNR= 2dB. (b) SNR=-2dB. (c) SNR=-6dB. (d) SNR=-10dB.

|  |  |
| --- | --- |
| (a) | (b) |
|  |  |
| (c) | (d) |

Figure S4: The confuse matrixes of MSDIN training on the AWGN Dataset and testing on the Watterson Dataset at different SNR. (a) SNR= 2dB. (b) SNR=-2dB. (c) SNR=-6dB. (d) SNR=-10dB.

|  |  |
| --- | --- |
| (a) | (b) |
|  |  |
| (c) | (d) |

Figure S5: The confuse matrixes of MAAN at different SNR, where source domain is the AWGN Dataset and target domain is the Watterson Dataset. (a) SNR= 2dB. (b) SNR=-2dB. (c) SNR=-6dB. (d) SNR=-10dB.

|  |  |
| --- | --- |
| (a) | (b) |
|  |  |
| (c) | (d) |

Figure S6: The confuse matrixes of MSDIN training on the Watterson Dataset and testing on the AWGN Dataset at different SNR. (a) SNR= 2dB. (b) SNR=-2dB. (c) SNR=-6dB. (d) SNR=-10dB.

|  |  |
| --- | --- |
| (a) | (b) |
|  |  |
| (c) | (d) |

Figure S: The confuse matrixes of MAAN at different SNR, where source domain is the Watterson Dataset and target domain is the AWGN Dataset. (a) SNR= 2dB. (b) SNR=-2dB. (c) SNR=-6dB. (d) SNR=-10dB.
